# Supplementary material for: Determination of Geographic Origin of Turquoise by Combining Laser Ablation Inductively Coupled Plasma Mass Spectrometry Analysis and Chemometrics
Source: MDPI journal article supplement (doi:10.3390/min13101338), 2023-10-19
Supplement: s1 [file s1]

**Table S1.** Corresponding elemental composition in figure 1.

| EDS area | Mineral   | Elemental composition (Normalized percentage, wt.%)                            |
|----------|-----------|--------------------------------------------------------------------------------|
| MAS 1    | Turquoise | 51.61% O, 23.34% Al, 17.70% P, 6.87% Cu, 0.43% Fe                              |
| MAS 2    | Variscite | 56.15% O, 22.18% P, 19.66% Al, 1.67% F, 0.34% Fe                               |
| AK 3     | Barite    | 43.58% Ba, 20.17% O, 14.07% S, 7.02% P, 6.74% Al, 4.46% Fe, 1.87% Cu, 1.14% Ca |
| AK 4     | Turquoise | 31.40% O, 23.67% P, 23.56% Al, 13.12% Cu, 8.25% Fe                             |
| MAS 5    | Turquoise | 52.44% O, 23.10% Al, 17.49% P, 6.27% Cu, 0.70% Fe                              |
| MAS 6    | Variscite | 58.32% O, 22.52% P, 19.16% Al                                                  |
| MAS 7    | Kaolinite | 54.4% O, 23.62% Al, 21.98% Si                                                  |
| SMR 8    | Turquoise | 55.45% O, 21.80% Al, 15.43% P, 6.81% Cu, 0.51% Fe                              |
| SMR 9    | Turquoise | 52.49% O, 22.50% Al, 16.35% P, 8.13% Cu, 0.53% Fe                              |
| ZS 10    | Turquoise | 48.13% O, 22.06% Al, 18.43% P, 8.39% Cu, 1.16% Fe                              |
| ZS 11    | Turquoise | 30.86% O, 16.72% Al, 13.97% P, 7.53% Cu, 3.30% Fe                              |
| WM 12    | Turquoise | 45.84% O, 24.43% Al, 19.30% P, 8.65% Cu, 1.79% Fe                              |
| WM 13    | Turquoise | 48.85% O, 24.14% Al, 18.57% P, 7.17% Cu, 1.26% Fe                              |
| WM 14    | Pyrite    | 50.15% S, 49.85% Fe                                                            |
